# Supplementary material for: Decellularized Matrix Induced Spontaneous Odontogenic and Osteogenic Differentiation in Periodontal Cells
Source: MDPI journal article supplement (doi:10.3390/biom13010122), 2023-01-06
Supplement: s1 [file s1]

## Supplementary Material

**Table S1.** Data of morphometric analysis of expression of osteocalcin in periodontal cells cultured on decellularized scaffolds under 2D conditions for 14 days.

Anova: Two-Factor with Replication

| SUMMARY         | PDLSCs   | PSCs     | PDLSCs+PSCs | Total    |
|-----------------|----------|----------|-------------|----------|
| <i>dTM</i>      |          |          |             |          |
| Count           | 6        | 6        | 6           | 18       |
| Sum             | 557.0224 | 558.6011 | 559.1664    | 1674.79  |
| Average         | 92.83707 | 93.10019 | 93.19441    | 93.04389 |
| Variance        | 14.30319 | 2.112903 | 4.38457     | 6.142054 |
| <i>dPDL</i>     |          |          |             |          |
| Count           | 6        | 6        | 6           | 18       |
| Sum             | 498.7494 | 499.7705 | 499.2014    | 1497.721 |
| Average         | 83.1249  | 83.29508 | 83.20023    | 83.20673 |
| Variance        | 24.25766 | 5.104121 | 46.21965    | 22.23497 |
| <i>dTM+dPDL</i> |          |          |             |          |
| Count           | 6        | 6        | 6           | 18       |
| Sum             | 528.8519 | 523.9058 | 525.213     | 1577.971 |
| Average         | 88.14198 | 87.31764 | 87.53551    | 87.66504 |
| Variance        | 5.443573 | 5.01808  | 32.10998    | 12.64987 |
| <i>Total</i>    |          |          |             |          |
| Count           | 18       | 18       | 18          |          |
| Sum             | 1584.624 | 1582.277 | 1583.581    |          |
| Average         | 88.03465 | 87.9043  | 87.97671    |          |
| Variance        | 29.5944  | 20.74668 | 42.05729    |          |

### ANOVA

| Source of Variance      | SS       | df | MS       | F        | P-value           | F crit      |
|-------------------------|----------|----|----------|----------|-------------------|-------------|
| Sample (Type of Matrix) | 873.4685 | 2  | 436.7343 | 28.28717 | <b>0.00000001</b> | 3.204317292 |
| Columns (Type of Cells) | 0.153551 | 2  | 0.076776 | 0.004973 | 0.995040156       | 3.204317292 |
| Interaction             | 2.534966 | 4  | 0.633741 | 0.041047 | 0.996683086       | 2.578739184 |
| Within                  | 694.7687 | 45 | 15.4393  |          |                   |             |
| Total                   | 1570.926 | 53 |          |          |                   |             |

**Table S2.** Data of morphometric analysis of expression of osteocalcin in periodontal cells cultured on decellularized scaffolds under 3D conditions for 14 days.

Anova: Two-Factor with Replication

| SUMMARY         | PDLSCs   | PSCs     | PDLSCs+PSCs | Total    |
|-----------------|----------|----------|-------------|----------|
| <i>dTM</i>      |          |          |             |          |
| Count           | 6        | 6        | 6           | 18       |
| Sum             | 591.1488 | 592.9355 | 593.4843    | 1777.569 |
| Average         | 98.5248  | 98.82259 | 98.91404    | 98.75381 |
| Variance        | 0.165595 | 0.208273 | 0.443267    | 0.269575 |
| <i>dPDL</i>     |          |          |             |          |
| Count           | 6        | 6        | 6           | 18       |
| Sum             | 579.8216 | 580.399  | 580.6771    | 1740.898 |
| Average         | 96.63694 | 96.73316 | 96.77952    | 96.71654 |
| Variance        | 1.988622 | 1.956386 | 1.325067    | 1.553756 |
| <i>dTM+dPDL</i> |          |          |             |          |
| Count           | 6        | 6        | 6           | 18       |
| Sum             | 584.0999 | 586.5875 | 586.9262    | 1757.614 |
| Average         | 97.34999 | 97.76458 | 97.82103    | 97.6452  |
| Variance        | 0.58151  | 0.508022 | 3.145786    | 1.292382 |
| <i>Total</i>    |          |          |             |          |
| Count           | 18       | 18       | 18          |          |
| Sum             | 1755.07  | 1759.922 | 1761.087    |          |
| Average         | 97.50391 | 97.77345 | 97.83819    |          |
| Variance        | 1.446115 | 1.556542 | 2.249521    |          |

| ANOVA                   |          |    |          |          |                  |             |
|-------------------------|----------|----|----------|----------|------------------|-------------|
| Source of Variance      | SS       | df | MS       | F        | P-value          | F crit      |
| Sample (Type of Matrix) | 37.45146 | 2  | 18.72573 | 16.32658 | <b>0.0000047</b> | 3.204317292 |
| Columns (Type of Cells) | 1.131536 | 2  | 0.565768 | 0.493282 | 0.61388227       | 3.204317292 |
| Interaction             | 0.222939 | 4  | 0.055735 | 0.048594 | 0.995401387      | 2.578739184 |
| Within                  | 51.61263 | 45 | 1.146947 |          |                  |             |
| Total                   | 90.41857 | 53 |          |          |                  |             |

**Table S3.** Data of morphometric analysis of expression of DSPP in periodontal cells cultured on decellularized scaffolds under 3D conditions for 14 days.

Anova: Single Factor

SUMMARY

| <i>Groups</i> | <i>Count</i> | <i>Sum</i> | <i>Average</i> | <i>Variance</i> |
|---------------|--------------|------------|----------------|-----------------|
| PDLSCs        | 7            | 174.9657   | 24.99509       | 15.56635        |
| PSCs          | 7            | 160.9187   | 22.98839       | 6.429955        |
| PDLSCs+PSCs   | 7            | 189.8346   | 27.11923       | 27.85641        |

ANOVA

| <i>Source of Variance</i> | <i>SS</i> | <i>df</i> | <i>MS</i> | <i>F</i> | <i>P-value</i>     | <i>F crit</i> |
|---------------------------|-----------|-----------|-----------|----------|--------------------|---------------|
| Between Groups            | 59.73957  | 2         | 29.86978  | 1.797482 | <b>0.194213874</b> | 3.554557146   |
| Within Groups             | 299.1163  | 18        | 16.61757  |          |                    |               |
| Total                     | 358.8559  | 20        |           |          |                    |               |

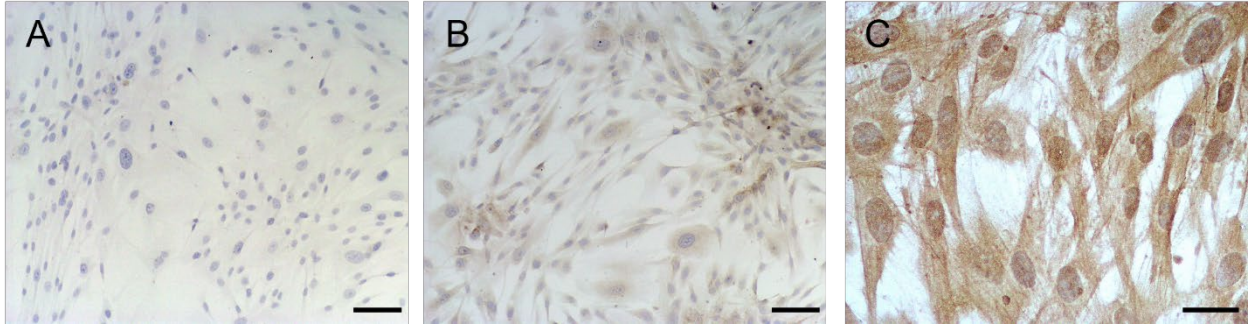

**Supplemental Figure S1.** Immunocytochemical staining of periodontal cells. The positive cells have brown color. The nuclei were counterstained with hematoxylin: (a) No staining of PSCs for OPN; Scale bar, 50  $\mu\text{m}$ ; (b) Weak PSCs staining for CD73; Scale bar, 50  $\mu\text{m}$ ; (c) Strong staining of PDLSCs for STRO-1; Scale bar, 200  $\mu\text{m}$ .

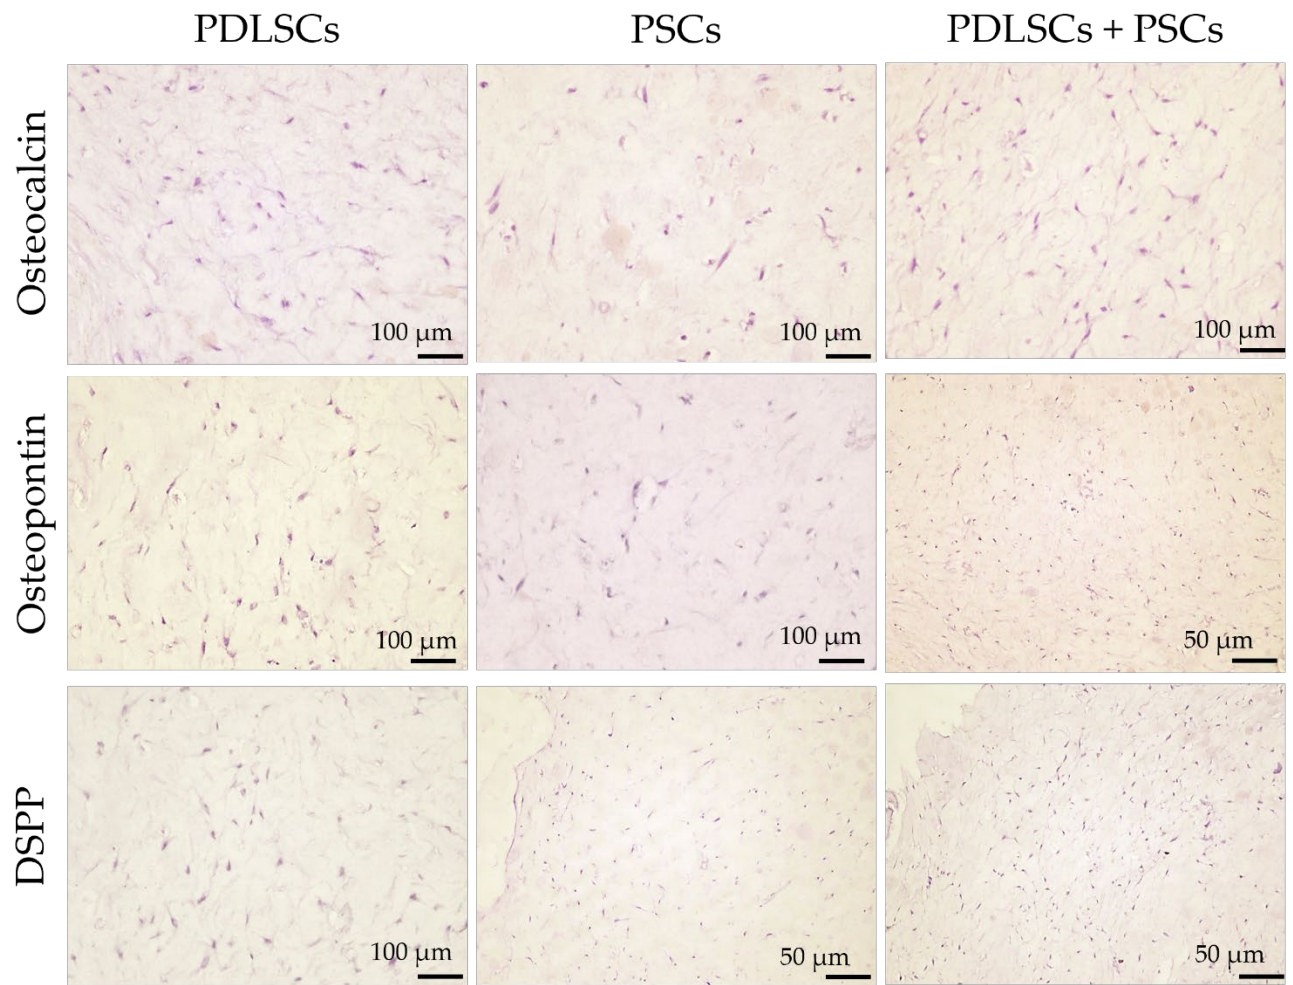

**Supplemental Figure S2.** Negative control. Immunocytochemical staining for osteogenic and odontogenic differentiation markers in periodontal cells cultured without decellularized scaffolds under 3D conditions for 14 days. The nuclei were counterstained with hematoxylin.
